# Supplementary material for: HepGentox: a novel promising HepG2 reportergene-assay for the detection of genotoxic substances in complex mixtures
Source: PeerJ. 2021 Jul 27;9:e11883. doi: 10.7717/peerj.11883 (PMC8323594; doi:10.7717/peerj.11883)
Supplement: Supplemental Information 6 [file peerj-09-11883-s006.xlsx]

## Sheet: FBS 4NQO
2* 10^4 Cells/well HepG2p53 cells were seeded into PEI coated 96 well plate in 100 µL DMEM +10%FCS (HyClone) + 1 % Pen/Strep30
24 hrs after seeding cells were treated with 100 µl DMEM incomplete + 1% Pen/Strep30 with different concentrations of FCS (15%, 10%, 5%) and different concentrations of 4-NQO (0.625, 0.313, 0.156, 0.078, 0.039, 0.020 µM from a 10 mM Stock in DMSO)
The 4-NQO (from a 10 mM Stock in DMSO) was diluted 1:40 and 1:4 in DMSO, which was further diluted to 0.625 µM in DMEM incomplete with 15%, 10% or 5% FCS + 1% Pen/Strep30
23 hrs after induction 10 µL 550 µM resazurin (from 5.5mM stock) in diluted in 1xPBS was added to the medium in each well - the measurements took place after another hour of incubation
1 hr after resazurin addition fluorescence was measured -> leading to a total incubation time of 24 h
after resazurin measurement cells were washed once with 40 µL 1xPBS and lysed in 25 µL Cell Lysis Buffer (25 mM Tris-Cl, 0.03% Triton X-100) --> shaking for 10 min
single luciferase measurement
1% DMSO over whole plate
					Threshold	15	1.7
						10	1.7
						5	1.7
	4NQO	0.05	STABW pos/neg	0.1	STABW pos/neg	0.15	STABW pos/neg
Nluc	0.63	9.79345	2.40204	9.26615	2.25745	11.5449	1.45642
	0.315	5.34835	1.22928	5.13961	1.65081	7.2813	4.15848
	0.1575	2.39354	0.551633	2.10458	0.491991	2.83722	1.2984
	0.07875	1.23429	0.15315	1.17007	0.107798	1.40851	0.349581
	0.039375	1.09492	0.0731654	0.979607	0.0797388	1.20461	0.16322
	0.0196875	0.99742	0.034868	1.01695	0.0687304	1.01739	0.0927272
	0	1	0	0.971648	0.0283517	1	0
rel viability	0.63	0.388585	0.0766673	0.331126	0.167621	0.548501	0.165426
	0.315	0.748474	0.17872	0.846037	0.194786	1.12017	0.0650298
	0.1575	0.881253	0.117388	1.04208	0.10515	1.18113	0.0391464
	0.07875	0.903237	0.0168519	0.996436	0.0841845	1.08168	0.108896
	0.039375	0.846709	0.0317025	0.948613	0.0691574	1.01362	0.057806
	0.0196875	0.868937	0.0224368	0.930525	0.0435635	0.95918	0.0568701
	0	1	0	1	0	1.02018	0.0116503

## Sheet: FBS BaP
2* 10^4 Cells/well HepG2p53 cells were seeded into PEI coated 96 well plate in 100 µL DMEM +10%FCS (HyClone) + 1 % Pen/Strep30
24 hrs after seeding cells were treated with 100 µl DMEM incomplete + 1% Pen/Strep30 with different concentrations of FCS (15%, 10%, 5%) and different concentrations of Benzo-a-pyrene (5.0, 2.5, 1.25, 0.625, 0.3125, 0.156 µM from a 100 mM Stock in DMSO)
The Benzo-a-pyrene (from a 100 mM Stock in DMSO) was diluted 1:100 and 1:2 in DMSO, which was further diluted to 5 µM in DMEM incomplete with 15%, 10% or 5% FCS + 1% Pen/Strep30
23 hrs after induction 10 µL 550 µM resazurin (from 5.5mM stock) in diluted in 1xPBS was added to the medium in each well - the measurements took place after another hour of incubation
1 hr after resazurin addition fluorescence was measured -> leading to a total incubation time of 24 h
after resazurin measurement cells were washed once with 40 µL 1xPBS and lysed in 25 µL Cell Lysis Buffer (25 mM Tris-Cl, 0.03% Triton X-100) --> shaking for 10 min
single luciferase measurement
1% DMSO over whole plate
					Threshold	15	1.7
						10	1.7
						5	1.7
	BaP	0.05	STABW pos/neg	0.1	STABW pos/neg	0.15	STABW pos/neg
Nluc	5	44.9426	7.01638	53.643	11.741	76.2881	23.9479
	2.5	74.2186	18.7093	54.7712	10.538	44.1591	13.711
	1.25	49.1013	20.2092	23.6756	9.86737	15.4635	7.41813
	0.625	10.8047	4.99271	3.88241	1.18312	2.92241	0.989934
	0.3125	1.74936	0.361537	1.40143	0.156168	1.29069	0.159268
	0.15625	1.09566	0.107611	0.952125	0.0506265	1.0215	0.0944046
	0	1	0	1	0	1	0
rel viability	5	0.739652	0.0225346	0.980044	0.0325597	0.909929	0.14734
	2.5	0.983902	0.11895	1.09397	0.10981	1.39042	0.0571502
	1.25	0.96548	0.0507264	1.05019	0.0768951	1.16757	0.0131432
	0.625	0.852701	0.0294596	0.819802	0.064576	0.966691	0.083512
	0.3125	0.854259	0.0475592	0.883317	0.0182343	0.851294	0.0277066
	0.15625	0.874029	0.0175628	0.769439	0.0477934	0.921607	0.0535044
	0	1	0	1	0	1	0

## Sheet: DMSO 4NQO
2*10^4 HepG2p53 cells were seeded into PEI coated 96 well plate in 100 µL DMEM +10%FCS (HyClone) + 1 % Pen/Strep30
24 hrs after seeding cells were treated with different concentrations of 4-Nitroquinoline-N-oxide (0.63, 0.31, 0.16, 0.08, 0.04, 0.02 µM)
The 4-NQO Stock (10 mM in DMSO) was diluted to 1:40 in DMSO, then diluted in DMEM with 5% FCS to 0.25, 0.5, 0.75, 1, 1.5, or 2% DMSO which was further diluted 1:2 logarithmical (in the DMSO containing Medium)
23 hrs after induction 10 µL 550 µM resazurin (from 5.5mM stock) in diluted in 1xPBS was added to the medium in each well - the measurements took place after another hour of incubation
1 hr after resazurin addition fluorescence was measured -> leading to a total incubation time of 24 h
after resazurin measurement cells were washed once with 40 µL 1xPBS and lysed in 25 µL Cell Lysis Buffer (25 mM Tris-Cl, 0.03% Triton X-100) --> shaking for 10 min
single luciferase measurement
0.25, 0.5, 0.75, 1, 1.5, 2 % DMSO over half plate
		4NQO
	µM	0.25 %	STABW pos/neg	0.5 %	STABW pos/neg	0.75 %	STABW pos/neg	0.01	STABW pos/neg	1.5 %	STABW pos/neg	0.02	STABW pos/neg
Nluc	0.63	9.36978	2.41193	7.53152	2.16863	5.03076	0.585017	4.34965	0.391871	5.63549	0.312266	5.27653	1.09728
	0.315	12.8909	2.2382	9.36908	1.71932	8.86687	1.55515	7.98743	1.90325	9.21822	2.1106	7.24915	3.56373
	0.1575	3.88644	0.781734	2.649	0.396578	3.28078	0.328882	2.65821	0.38862	2.72755	0.407126	2.04895	0.335366
	0.07875	1.5666	0.179381	1.33687	0.0931983	1.45672	0.182122	1.32153	0.10465	1.35955	0.0788148	1.27882	0.705425
	0.039375	0.925105	0.0709538	0.982419	0.0376222	1.07933	0.089214	1.04167	0.0543665	1.23553	0.196291	1.03539	0.336271
	0.0196875	0.909147	0.050888	0.890834	0.0729526	0.979013	0.0749133	1.05589	0.0980794	1.1874	0.148987	1.2098	0.24439
	0	1	0	1	0	1	0	1	0	1	0	1	0
rel viability	0.63	0.406726	0.036849	0.352057	0.0410478	0.475662	0.0636656	0.421039	0.0522905	0.313439	0.0440608	0.342995	0.0768503
	0.315	0.673771	0.0559351	0.7205	0.0863799	0.678078	0.0882794	0.664108	0.0630414	0.603666	0.0152644	0.717951	0.131654
	0.1575	0.873375	0.0362401	0.932773	0.0995056	0.93659	0.0806447	0.816387	0.0572435	0.895597	0.0211566	0.883587	0.0486384
	0.07875	0.887942	0.0676731	0.874839	0.0754065	0.81927	0.0393325	0.813052	0.0618469	0.816873	0.0628758	0.88825	0.11707
	0.039375	0.875861	0.0447041	0.797752	0.0484642	0.869866	0.0307157	0.798934	0.0491155	0.856708	0.0243156	0.859435	0.048454
	0.0196875	0.855405	0.0106273	0.832924	0.0569189	0.914125	0.0369857	0.890723	0.0456255	0.883766	0.0434984	0.94394	0.0596957
	0	1	0	1	0	1	0	1	0	1	0	1	0
	Threshold
	0.0025	1.7
	0.005	1.7
	0.0075	1.7
	0.01	1.7
	0.015	1.7
	0.02	1.7

## Sheet: DMSO BaP
2*10^4 HepG2p53 cells were seeded into PEI coated 96 well plate in 100 µL DMEM +10%FCS (HyClone) + 1 % Pen/Strep30
24 hrs after seeding cells were treated with different concentrations of Benzo-a-pyrene (5, 2.5, 1.25, 0.63, 0.31, 0.16 µM)
The BaP Stock (100 mM in DMSO) was diluted to 1:50 in DMSO, then diluted in DMEM/DMSO with 5% FCS to 0.25, 0.5, 0.75, 1, 1.5, or 2% DMSO which was further diluted 1:2 logarithmical (in the DMSO containing Medium)
23 hrs after induction 10 µL 550 µM resazurin (from 5.5mM stock) in diluted in 1xPBS was added to the medium in each well - the measurements took place after another hour of incubation
1 hr after resazurin addition fluorescence was measured -> leading to a total incubation time of 24 h
after resazurin measurement cells were washed once with 40 µL 1xPBS and lysed in 25 µL Cell Lysis Buffer (25 mM Tris-Cl, 0.03% Triton X-100) --> shaking for 10 min
single luciferase measurement
0.25, 0.5, 0.75, 1, 1.5, 2 % DMSO over half plate
		Benzo-a-pyrene
	µM	0.25 %	STABW pos/neg	0.5 %	STABW pos/neg	0.75 %	STABW pos/neg	0.01	STABW pos/neg	1.5 %	STABW pos/neg	0.02	STABW pos/neg
Nluc	5	34.4084	2.60487	32.548	4.47472	44.7439	2.9229	42.5119	4.90622	28.6214	9.84474	12.0693	3.30557
	2.5	36.7776	2.12799	48.4294	3.18898	63.7716	3.12019	68.5802	6.79243	47.1063	3.97345	19.0785	4.79177
	1.25	59.217	6.38526	83.2767	9.69504	93.4734	7.79402	99.293	7.78886	71.502	6.01816	27.2465	8.23083
	0.625	38.3205	4.78448	32.6413	5.09904	38.402	1.7963	33.65	7.0361	20.5055	4.32352	6.91498	2.09167
	0.3125	3.98033	0.177984	2.79946	0.248201	2.76599	0.422167	2.50685	0.294823	1.8694	0.145029	1.43673	0.24102
	0.15625	1.28354	0.0353893	1.24753	0.110174	1.15225	0.0780166	1.21008	0.0638989	1.23147	0.148028	1.12296	0.131545
	0	1	0	1	0	1	0	1	0	1	0	1	0
rel viability	5	0.69489	0.133686	0.620967	0.117775	0.558397	0.0453035	0.554336	0.0657376	0.766967	0.0708186	0.971766	0.140294
	2.5	0.892665	0.0819177	0.923378	0.0921391	0.794563	0.111784	0.855381	0.0876619	1.02073	0.0729411	1.18064	0.0912045
	1.25	0.93037	0.102273	0.907197	0.0994723	0.988291	0.0622574	0.944789	0.0656779	1.04548	0.0916608	1.10345	0.0254461
	0.625	0.849436	0.0532219	0.827365	0.0550059	0.883938	0.0356183	0.842818	0.0218571	0.925295	0.0160301	0.989127	0.0398884
	0.3125	0.879952	0.0283881	0.851443	0.0188983	0.873788	0.0479263	0.852085	0.0645	0.921541	0.0284902	0.965451	0.0496001
	0.15625	0.954876	0.034948	0.865413	0.0327274	0.936136	0.027915	0.891311	0.0344861	0.990961	0.0404927	0.980005	0.0130038
	0	1	0	1	0	1	0	1	0	1	0	1	0
	Threshold
	0.0025	1.7
	0.005	1.7
	0.0075	1.7
	0.01	1.7
	0.015	1.7
	0.02	1.7
